# Supplementary material for: BiFeO3 perovskite-based all oxide ambient stable spectrally selective absorber coatings for solar thermal application
Source: Royal Society of Chemistry journal article supplement (doi:10.1039/d3se01436c), 2024-01-01
Supplement: d3se01436c1.pdf [file d3se01436c1.pdf]

## Supplementary Information

### BiFeO<sub>3</sub> perovskite based all oxide ambient stable spectrally selective absorber coatings for solar thermal application

Aryaveer Singh, Chandra Prakash, Priyambada Sahoo, Ambesh Dixit\*

Advanced Materials and Device (A-MAD) Laboratory, Department of Physics, Indian Institute of Technology, Jodhpur, Rajasthan, India (342030)

\* [ambesh@iitj.ac.in](mailto:ambesh@iitj.ac.in)

**Table S1.** Photothermal conversion efficiency ( $\eta$ ) values of BFO/Al, BFO/SS, and BFO/Cu for different layer SSACs.

| No. of layers | BFO/Al | BFO/SS | BFO/Cu |
|---------------|--------|--------|--------|
| 4             | 0.34   | 0.58   | 0.83   |
| 8             | 0.46   | 0.62   | 0.83   |
| 12            | 0.52   | 0.65   | 0.83   |
| 16            | 0.54   | 0.67   | 0.83   |

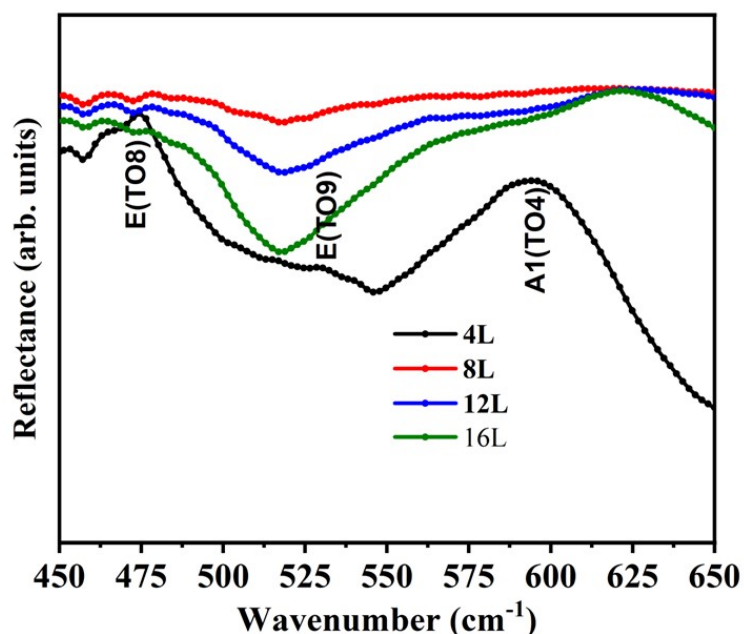

**Figure S1.** IR active modes in reflectance vs wavelength plot of BFO/Cu SSACs.

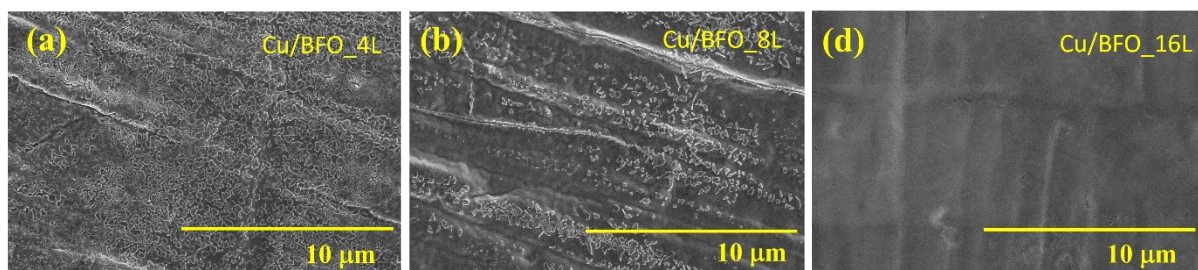

**Figure S2.** Low-resolution FE-SEM images of (a) 4-layer BFO/Cu, (b) 8-layer BFO/Cu, and (c) 16-layer BFO/Cu SSACs.

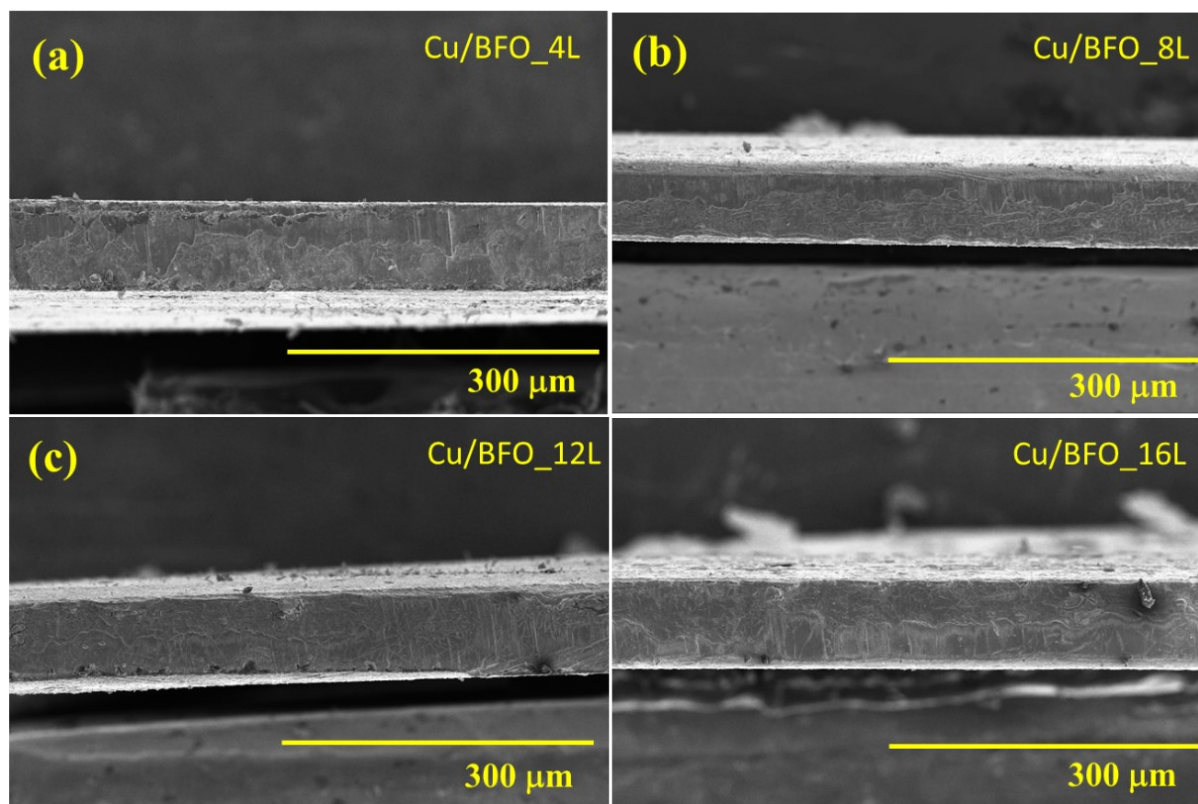

**Figure S3.** Cross-sectional FE-SEM images for (a) 4-layers BFO/Cu, (b) 8-layers BFO/Cu, (c) 12-layers BFO/Cu, and (d) 16-layers BFO/Cu SSACs.

| Element   | Atomic %     |
|-----------|--------------|
| <b>O</b>  | <b>63.30</b> |
| <b>Fe</b> | <b>11.08</b> |
| <b>Bi</b> | <b>12.61</b> |
| <b>Cu</b> | <b>13.00</b> |

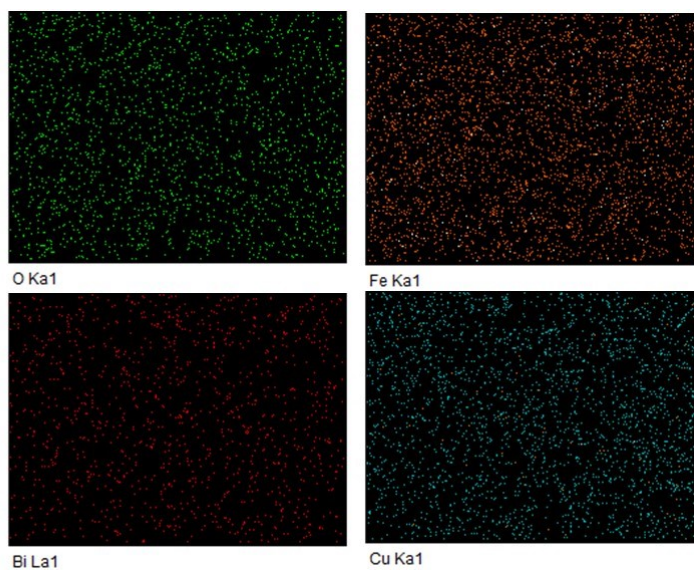

**Figure S4.** The tabular image shows the Stoichiometric ratio of the Bi, Fe, O and Cu in the BFO/Cu SSACs, and the left image shows its elemental mapping.
